# Supplementary material for: Adsorption Media for the Removal of Soluble Phosphorus from Subsurface Drainage Water
Source: Int J Environ Res Public Health. 2020 Oct 21;17(20):7693. doi: 10.3390/ijerph17207693 (PMC7593909; doi:10.3390/ijerph17207693)
Supplement: Supplementary file 1 [file ijerph-17-07693-s001.xlsx]

## Sheet: Analysis
Mass of SRP Requiring Treatment (kg)	1.66		acres	14.9
Capital Cost (GNEM) ($/kg)	19		hectares	6.02984
Capital Cost (SFS) ($/ton)	49.92
Capital Cost (SFS) ($/kg)	0.04992
Manufacturer Regeneration Cost (GNEM) ($/kg)	2
Onsite Regeneration Cost (GNEM) ($/kg)	1
		Scenario A: GNEM +Manufacturer Regeneration						Scenario B: GNEM +On-Site Regeneration						Scenario C: Steel Furnace Slag +No Regeneration + Removal
		Year 0		Year 1 to 14		Year 15		Year 0		Year 1 to 14		Year 15		Year 0		Year 1 to 14		Year 15
Media Capital Cost		47151.9		-		-		47151.9		-		-		1258.01		1258.01		-
Contactor Capital Cost		6271		-		-		6271		-		-		10503		-		-
Contactor Installation Cost		640		-		-		640		-		-		640		-		-
Labor to Install/Re-Install Media in Contactor		480		480				480		480		-		480		480		-
Shipping Cost		201		370		169		201		-		169		-		-		-
Regeneration Cost		-		4963.35		4963.35		-		2480.46		2480.46		-		-		-
Labor to Remove Media from Contactor		-		480		480		-		480		480		-		480		480
Removal Cost via Vacuum Truck		-		-		-		-		-		-		-		1909.21		1909.21
Disposal Cost		-		-				-		-		-		-		592.451		592.451
Annual Cost (Separate)		54743.9		6293.35		5612.35		54743.9		3440.46		3129.46		12881		4719.67		2981.66
Total Cost for 15 Years (Separate)		54743.9		88107		5612.35		54743.9		48166.5		3129.46		12881		66075.4		2981.66
Total Cost (Together)		148463						106040						81938
Annual Cost (Together)		9897.55						7069.32						5462.54
Annual Cost Per Acre		664.265						474.451						366.613
Percent Difference Compared to Scenario A		-						0.333382						0.577472
Percent Difference Compared to Scenario B		0.333382						-						0.256432
Percent Difference Compared to Scenario C		0.577472						0.256432						-
Annual Cost Per Hectare		1641.43						1172.39						905.917
Percent Difference Compared to Scenario A		-						0.333382						0.577472
Percent Difference Compared to Scenario B		0.333382						-						0.256432
Percent Difference Compared to Scenario C		0.577472						0.256432						-

## Sheet: Manuscript Data
Total volume at site from Jan-Jun		24508.1	m^3	V_SFS_column	240	mL
				V_GNEM_column	190	mL
				mass_SFS	353.5	g
				mass_GNEM	111.7	g
SFS									GNEM
https://www.wolframalpha.com/input/?i=y%3D101.97%280.25%29%2B0.1755									https://www.wolframalpha.com/input/?i=y%3D271.64%280.25%29%2B6.8064
y	25.668	mg SRP	when x=0.25						y	74.7164	mg SRP	when x=0.25
	0.10695	mg SRP/mL SFS								0.393244	mg SRP/mL GNEM
	0.072611	mg SRP/g SFS								0.668902	mg SRP/g GNEM
V_SFS	15.5213	cubic m	for 1.66 kg SRP						V_GNEM	4.2213	cubic m	for 1.66 kg SRP
Total P Loaded (mg)		Effluent SRP Conc. (mg/L)
SFS	GNEM	SFS	GNEM
0	0	0.025	0.025
3.18168	2.17512	0.025	0.025
6.01101	2.81352	0.025	0.025
33.1108	22.2001	0.354	0.027
34.2079	24.9379	0.389	0.064
34.7157	26.4146	0.381	0.057
41.6331	49.0706	0.435	0.17
42.4269	52.3634	0.459	0.231
45.999	66.7154	0.454	0.257
46.4639	68.9042	0.455	0.3
48.7391	77.7301	0.465	0.139
50.754	97.1369	0.483	0.295
53.3902	109.278	0.458	0.353
54.8871	115.844	0.523	0.353
55.2466	124.216	0.512	0.448
56.4592	130.442	0.511	0.452

## Sheet: GNEM+Manufacturer Regen.
GNEM + Regeneration by Manufacturer				Assumptions: a. That the farmer has the equipment and time to install, maintain, and remove the media b. That the container used to ship and hold the GNEM at the site is negligible cost-wise c. The GNEM lasts 15 years with the proper regeneration d. Regeneration of the GNEM is done once a year h. Assume that the cost to regenerate the GNEM via MetaMateria includes only the cost of the regeneratio…
Parameter	Value	Units	Notes
Initial Calculations and Media Characteristics
Media Capital Cost	19	$/kg
Volume of Media used in Column Study Phase X	190	mL media
Mass of Media used in Column Study Phase X	111.7	g media
Calculated Bulk Density	0.587895	g media/mL media
Calculated Capacity of Media when Media reaches Breakthrough Capacity (breakthrough capacity)	0.668902	mg SRP/g media	Breakthrough capacity is when the effluent is 50% of the influent
Media Amount Based on kg SRP lost from Tile Drain
SRP lost out of Tile Drain	1.66	kg	Change this value to change the total annual cost per acre
Mass of Media Required to Treat Lost SRP if Breakthrough Capacity is Assumed	2481.68	kg
Volume of Media Required to Treat Lost SRP if Breakthrough Capacity is Assumed	4.2213	m^3
Task A - The GNEM Capital Cost
Mass of Media Required to Treat Lost SRP if Breakthrough Capacity is Assumed	2481.68	kg
Regeneration Periods over Lifetime of GNEM	15	regeneration periods	15 year lifetime
Media Capital Cost	19	$/kg
Calculated Capital Cost	47151.9	$
Task B, Task C, and Task F The Cost to Ship the GNEM using U-Ship Estimates for a "Full Truckload Freight" & "Full Truckload" (https://www.uship.com/shipping-calculator.aspx)
Manufactuer Zip Code	43228	N/A
Farm Zip Code	49256	N/A	Farm is "Site BN"
Miles from Manufacturer to Farm	183	miles	From U-Ship
Miles from Farm to Manufacturer	185	miles	From U-Ship
Mass of Media Required to Treat Lost SRP if Breakthrough Capacity is Assumed	2481.68	kg
Mass of Media Required to Treat Lost SRP if Breakthrough Capacity is Assumed	5471.16	lb
Shipping from Manufactuer to Farm	201	$	Task B; from U-ship
Cost to ship a pound of media a mile	0.000200755	$/lb/mile	Task B; calculated
Shipping from Farm to Manufacturer for Regeneration	169	$	Task C; from U-ship
Cost to ship a pound of media a mile	0.000166969	$/lb/mile	Task C; calculated
Shipping from Manufactuer to Farm after Regeneration	201	$	Task F; from U-ship
Cost to ship a pound of media a mile	0.000200755	$/lb/mile	Task F; calculated
Total Shipping Cost	571	$	Sum of Task B, Task C, and Task F
Task D The Cost to Regenerate the GNEM Media at the Manufacturer
Regeneration Unit Price Set by Manufacturer	2	$/kg
Mass of Media Required to Treat Lost SRP if Breakthrough Capacity is Assumed	2481.68	kg
Total Regeneration Cost by Manufacturer	4963.35	$
Task H Estimated Cost of the Contactor, Labor, and Installation
Contactor Capital Cost	6271	$
Contactor Shipping Cost	414	$
Total Contactor Cost	6685	$
Labor Cost	480	$
Contactor Installation Cost	640	$
Gallons of media	1115.15	gal	For sizing the contactor

## Sheet: GNEM+On-site Regen.
GNEM + Regeneration by Manufacturer				Assumptions: a. That the farmer has the equipment and time to install, maintain, and remove the media b. That the container used to ship and hold the GNEM at the site is negligible cost-wise c. The GNEM lasts 15 years with the proper regeneration d. Regeneration of the GNEM is done once a year e. The cost to regenerate the GNEM on-site is half the cost of regenerating the GNEM at the manufacturer…
Parameter	Value	Units	Notes
Initial Calculations and Media Characteristics
Media Capital Cost	19	$/kg
Volume of Media used in Column Study Phase X	190	mL media
Mass of Media used in Column Study Phase X	111.7	g media
Calculated Bulk Density	0.587895	g media/mL media
Calculated Capacity of Media when Media reaches Breakthrough Capacity (breakthrough capacity)	0.668902	mg SRP/g media	Breakthrough capacity is when the effluent is 50% of the influent
Media Amount Based on kg SRP lost from Tile Drain
SRP lost out of Tile Drain	1.66	kg	Change this value to change the total annual cost per acre
Mass of Media Required to Treat Lost SRP if Breakthrough Capacity is Assumed	2481.68	kg
Volume of Media Required to Treat Lost SRP if Breakthrough Capacity is Assumed	4.2213	m^3
Task A - The GNEM Capital Cost
Mass of Media Required to Treat Lost SRP if Breakthrough Capacity is Assumed	2481.68	kg
Regeneration Periods over Lifetime of GNEM	15	regeneration periods	15 year lifetime
Media Capital Cost	19	$/kg
Calculated Capital Cost	47151.9	$
Task B The Cost to Ship the GNEM using U-Ship Estimates for a "Full Truckload Freight" & "Full Truckload" (https://www.uship.com/shipping-calculator.aspx)
Manufactuer Zip Code	43228	N/A	Manufacturer is MetaMateria
Farm Zip Code	49256	N/A	Farm is "Site BN"
Miles from Manufacturer to Farm	183	miles	From U-Ship
Mass of Media Required to Treat Lost SRP if Breakthrough Capacity is Assumed	2481.68	kg
Mass of Media Required to Treat Lost SRP if Breakthrough Capacity is Assumed	5471.16	lb
Shipping from Manufactuer to Farm	201	$	Task B; from U-ship
Cost to ship a pound of media a mile	0.000200755	$/lb/mile	Task B; calculated
Total Shipping Cost	201	$	Only Task B
Task E The Cost to Regenerate the GNEM Media On-Site
Regeneration Unit Price	1	$/kg	Assumed to be half of the manufacturer's regeneration unit price
Mass of Media Required to Treat Lost SRP if Breakthrough Capacity is Assumed	2481.68	kg
Total On-Site Regeneration Cost	2481.68	$
Task G The value of regenerated, or recovered phosphorus from the GNEM media as P for DAP fertilizer
Calculated Mass of SRP Adsorbed to GNEM Assuming Breakthrough Capacity	1660	g SRP	Assume that 100% of the SRP can be recovered off the media & assume that SRP = phosphate
Calculated Mass of P	541.326	g P	https://support.hach.com/app/answers/answer_view/a_id/1007934/~/what-is-the-factor-to-convert-from-po4-to-po4-p%3F-
Cost of P	0.00224356	$/g P
Total Value of Regenerated P off the GNEM Media	1.2145	$	from cell B50
Task H Estimated Cost of the Contactor, Labor, and Installation
Contactor Capital Cost	6271	$
Contactor Shipping Cost	414	$
Total Contactor Cost	6685	$
Labor Cost	480	$
Contactor Installation Cost	640	$
Gallons of media	1115.15	gal	For sizing the contactor
Calculating the cost of fertilizer to get value of calcium phosphate
Cost of DAP	410	$/ton	https://agfax.com/2020/08/07/dtn-fertilizer-trends-prices-continue-mostly-lower/
lbs P2O5 per ton (DAP)	920	lb P2O5/ton	2,000 lbs in a ton; 46% P as P2O5
lbs P per ton (DAP)	402.04	lb P	https://aces.nmsu.edu/pubs/_a/A133/welcome.html
Cost of each lb P (DAP)	1.0198	$/lb P
Cost of each g P (DAP)	0.00224356	$/g P	2.2 lb per kg

## Sheet: SFS+No Regen.+Removal
Steel Furnace Slag + No Regeneration + Removal				Assumptions: a. The capital and shipping cost for the steel furnace slag is $49.92/ton (given by Edward Levy Company) b. The cost of the container used to hold the steel furnace slag on-site is negligible c. The farmer has the necessary equipment to install the media d. The farmer does not have the necessary equipment to remove the media e. The vacuum truck is allowed to access the Ann Arbor Recy…
Parameter	Value	Units	Notes
Initial Calculations and Media Characteristics
Combined Media Capital and Shipping Cost	49.92	$/ton	Estimate given by Edward Levy Company
Volume of Media used in Column Study Phase X	240	mL media
Mass of Media used in Column Study Phase X	353.5	g media
Calculated Bulk Density	1.47292	g media/mL media
Calculated Capacity of Media when Media reaches Breakthrough Capacity (breakthrough capacity)	0.072611	mg SRP/g media	Breakthrough capacity is when the effluent is 50% of the influent
Media Amount Based on kg SRP lost from Tile Drain
SRP lost out of Tile Drain	1.66	kg	Change this value to change the total annual cost per acre
Mass of Media Required to Treat Lost SRP if Breakthrough Capacity is Assumed	22861.5	kg
Volume of Media Required to Treat Lost SRP if Breakthrough Capacity is Assumed	15.5213	m^3
Task H Cost to Ship the Steel Furnace Slag from Edward Levy to Farm
Manufacturer Zip Code	48120	N/A	Edward Levy is the Manufacturer
Farm Zip Code	49256	N/A
Combined Media Capital and Shipping Cost	49.92	$/ton	Estimate given by Edward Levy Company
Mass of Media Required to Treat Lost SRP if Breakthrough Capacity is Assumed	22861.5	kg
Mass of Media Required to Treat Lost SRP if Breakthrough Capacity is Assumed	25.2005	ton
Total Capital and Shipping Cost	1258.01	$
Task I Cost to Rent Vacuum Truck
Base Rental Rate	725	$/truck/day
Days Rented	2	days
Vacuum Truck Holding Capacity	3000	gallons
Vacuum Truck Holding Capacity	11	m^3
Vacuum Truck Holding Capacity	14.388	yd^3	1 m^3 = 1.308 yd^3
Trucks Required	1	truck
Total Base Rental Cost	1450	$
Task J Cost of Vacuum Truck Fuel
Diesel Fuel Cost for Midwest Region	2.978	$/gallon
Vacuum Truck Holding Capacity	3000	gallons
Vacuum Truck Holding Capacity	11	m^3
Vacuum Truck Diesel Fuel Tank Volume	113	gallons
Vacuum Truck Mileage	7.5	MPG
Vacuum Truck Rental Zip Code	48150	N/A
Ann Arbor Recycling Center Zip Code	48108	N/A
“Site BN” / Farm Zip Code	49256	N/A
Distance between Vacuum Truck Rental and Farm	86	miles
Distance between Farm and Recycling Center	65	miles
Distance between Recycling Center and Vacuum Truck Rental	28	miles
Total Distance Traveled	309	miles
Amount of Fuel Required for Driving	41.2	gallons
Amount of Fuel Required for Operation	56.5	gallons/removal period
Number of Removal Periods	4		removing media from farm and removing media from truck at recycling center EACH once per day
Total Amount of Fuel Required	154.2	gallons	This is the amount of fuel needed to operate the vcacuum truck for two days and return it with a full tank of gas
Total Fuel Cost	459.208	$
Task K Cost to Dispose SFS at Recycling Center
Entrance Fee	12	$/truck/day
General Waste Disposal Cost	28	$/yd^3
Volume of Media Required to Treat Lost SRP if Breakthrough Capacity is Assumed	15.5213	m^3
Volume of Media Required to Treat Lost SRP if Breakthrough Capacity is Assumed	20.3018	yd^3	1 m^3 = 1.308 yd^3
Volume of Media to be Disposed Each Day	10.1509	yd^3
Total Cost of Disposal	592.451	$
Task N Estimated Cost of the Contactor, Labor, and Installation
Contactor Capital Cost	10503	$
Contactor Shipping Cost	366	$
Total Contactor Cost	10869	$
Labor Cost	480	$
Contactor Installation Cost	640	$
Gallons of media	4100.29	gal	For sizing the contactor
